# Supplementary material
Source: MDPI journal article supplement (https://www.mdpi.com/2073-4344/11/11/1282)
Supplement: s1 [file s1]

Supporting Materials

# Enhanced In Vitro Cascade Catalysis of Glycerol into Pyruvate and Acetoin by Integration with Dihydroxy Acid Dehydratase from *Paralcaligenes ureilyticus*

Shiting Guo, Xiaoxu Tan, Yuxian Wang, Kai Li, Chuanjuan Lü \*, Cuiqing Ma, and Chao Gao

State Key Laboratory of Microbial Technology, Shandong University, Qingdao 266237, People's Republic of China; guoshiting66@mail.sdu.edu.cn (S.G.); tanxiaoxu@mail.sdu.edu.cn (X.T.); 201812522@mail.sdu.edu.cn (Y.W.); likai03721@sdu.edu.cn (K.L.); macq@sdu.edu.cn (C.M.); jieerbu@sdu.edu.cn (C.G.)

\* Correspondence: chuanjuanlv@mail.sdu.edu.cn; Tel.: 86-532-58631561 (C.L.)

**Citation:** Guo, S.; Tan, X.; Wang, Y.; Li, K.; Lü, C.; Ma, C.; Gao, C. Enhanced In Vitro Cascade Catalysis of Glycerol into Pyruvate and Acetoin by Integration with Dihydroxy Acid Dehydratase from *Paralcaligenes ureilyticus*. *Catalysts* **2021**, *11*, 1282. <https://doi.org/10.3390/catal11111282>

Academic Editor: Nicholas Harmer

Received: 23 September 2021

Accepted: 18 October 2021

Published: 23 October 2021

**Publisher's Note:** MDPI stays neutral with regard to jurisdictional claims in published maps and institutional affiliations.

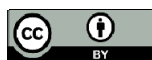

**Copyright:** © 2021 by the authors. Licensee MDPI, Basel, Switzerland. This article is an open access article distributed under the terms and conditions of the Creative Commons Attribution (CC BY) license (<https://creativecommons.org/licenses/by/4.0/>).

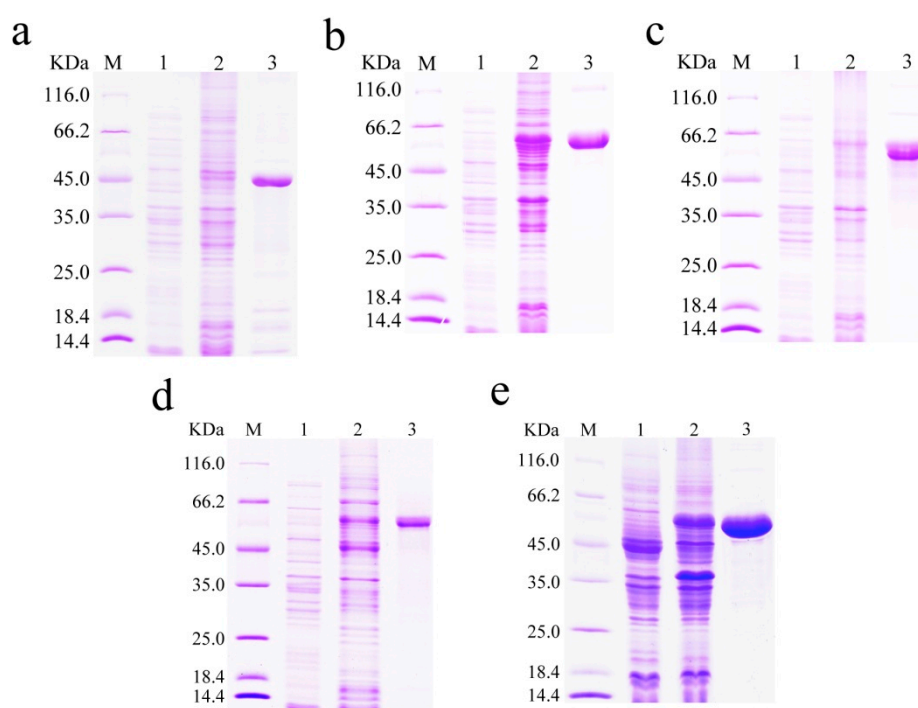

**Figure S1.** SDS-PAGE results of the purification of ScALDO, SsDHAD, CcXylD, PuDHT, and ZmPDC. (a) ScALDO. (b) SsDHAD. (c) CcXylD. (d) PuDHT. (e) ZmPDC. Lane M, molecular mass marker; lane 1, crude extract of *E. coli* BL21(DE3); lane 2, crude extracts of *E. coli* BL21(DE3) harboring expression vectors of different proteins; lane 3, purified target proteins.

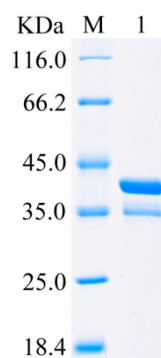

**Figure S2.** SDS-PAGE result of the purification of PaLdhA. Lane M, molecular mass marker; lane 1, purified PaLdhA.

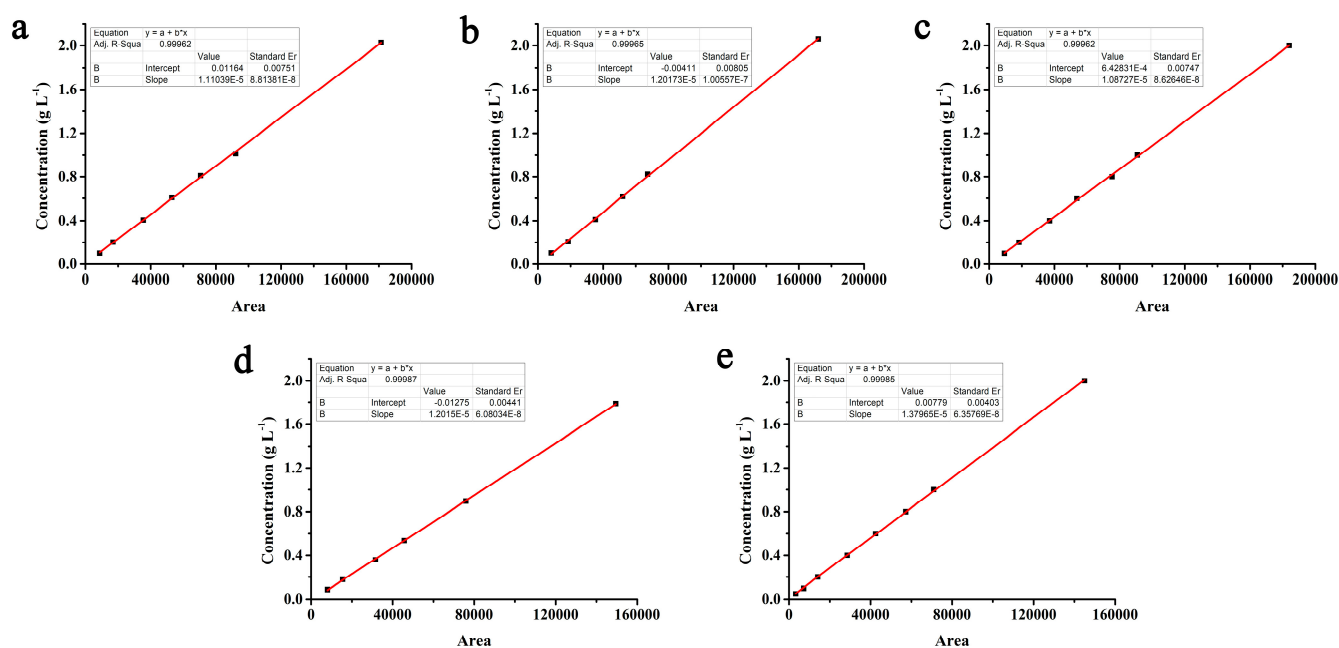

**Figure S3.** Calibration curves for the concentrations assayed by HPLC. (a) Glycerol. (b) Glyceraldehyde. (c) Glycerate. (d) Pyruvate. (e) Acetoin.

Table S1. Strains, plasmids, and primers used in this study.

| Strain, plasmid and primer                                   | Description                                                                                                                                                                                                  | Source          |
|--------------------------------------------------------------|--------------------------------------------------------------------------------------------------------------------------------------------------------------------------------------------------------------|-----------------|
| <b>Strain</b>                                                |                                                                                                                                                                                                              |                 |
| <i>E. coli</i> DH5 $\alpha$                                  | F <sup>-</sup> $\phi$ 80 <i>lacZ</i> $\Delta$ M15 $\Delta$ ( <i>lacZYA-argF</i> )U169 <i>deoR recA1 endA1 hsdR17</i> (r $\kappa^-$ , m $\kappa^+$ ) <i>phoA supE44</i> $\lambda^-$ <i>thi-1 gyrA96 relA1</i> | Novagen         |
| <i>E. coli</i> DH5 $\alpha$ /pETDuet–PaLdhA                  | <i>E. coli</i> DH5 $\alpha$ expressing PaLdhA from <i>Pseudomonas aeruginosa</i> PAO1                                                                                                                        | This study      |
| <i>E. coli</i> BL21(DE3)                                     | F <sup>-</sup> <i>ompT hsdSB</i> (rB <sup>-</sup> mB <sup>-</sup> ) <i>gal</i> ( $\lambda$ c I 857 <i>ind1 Sam7 nin5 lacUV5-T7gene1</i> ) <i>dcm</i> (DE3)                                                   | Novagen         |
| <i>E. coli</i> BL21(DE3)/pETDuet–ScALDO                      | <i>E. coli</i> BL21(DE3) expressing ScALDO from <i>Streptomyces coelicolor</i> A3 with mutants (V125M/A244T)                                                                                                 | [1]             |
| <i>E. coli</i> BL21(DE3)/pETDuet–SsDHAD                      | <i>E. coli</i> BL21(DE3) expressing SsDHAD from <i>Sulfolobus solfataricus</i>                                                                                                                               | [1]             |
| <i>E. coli</i> BL21(DE3)/pET28a–PuDHT                        | <i>E. coli</i> BL21(DE3) expressing PuDHT from <i>Paralcaligenes ureilyticus</i>                                                                                                                             | This study      |
| <i>E. coli</i> BL21(DE3)/pET28a–CcXylD                       | <i>E. coli</i> BL21(DE3) expressing CcXylD from <i>Caulobacter crescentus</i>                                                                                                                                | This study      |
| <i>E. coli</i> BL21(DE3)/pETDuet–ZmPDC                       | <i>E. coli</i> BL21(DE3) expressing ZmPDC from <i>Zymomonas mobile</i>                                                                                                                                       | [2]             |
| <i>E. coli</i> BL21(DE3)/pETDuet–PaLdhA                      | <i>E. coli</i> BL21(DE3) expressing PaLdhA from <i>Pseudomonas aeruginosa</i> PAO1                                                                                                                           | This study      |
| <b>Plasmid</b>                                               |                                                                                                                                                                                                              |                 |
| pETDuet-1                                                    | Vector for protein expression, Ap <sup>r</sup>                                                                                                                                                               | Novagen         |
| pET28a–PuDHT                                                 | pET28a(+) carrying <i>puDht</i> gene from <i>Paralcaligenes ureilyticus</i>                                                                                                                                  | General Biology |
| pETDuet–PaLdhA                                               | pETDuet carrying <i>ldhA</i> gene from <i>Pseudomonas aeruginosa</i> PAO1                                                                                                                                    | This study      |
| pET28a–CcXylD                                                | pET28a(+) carrying <i>xylD</i> gene from <i>Caulobacter crescentus</i>                                                                                                                                       | [3]             |
| <b>Primer</b>                                                |                                                                                                                                                                                                              |                 |
| <b>Sequence (5' <math>\rightarrow</math> 3')<sup>1</sup></b> |                                                                                                                                                                                                              |                 |
| PaLdhA-F                                                     | CGCGGATCCCGATGCGCATCCTGTTCTT (BamHI)                                                                                                                                                                         | This study      |
| PaLdhA-R                                                     | CCCAAGCTTTCAGGCCCGGACCCGATT (HindIII)                                                                                                                                                                        | This study      |

<sup>1</sup> Restriction sites are underlined and the restriction enzymes are indicated in parentheses.

## References

1. Gao, C.; Li, Z.; Zhang, L.; Wang, C.; Li, K.; Ma, C.; Xu, P. An artificial enzymatic reaction cascade for a cell-free bio-system based on glycerol. *Green Chem.* **2015**, *17*, 804–807.
2. Li, Z.; Zhang, M.; Jiang, T.; Sheng, B.; Ma, C.; Xu, P.; Gao, C. Enzymatic cascades for efficient biotransformation of racemic lactate derived from corn steep water. *ACS Sustainable Chem. Eng.* **2017**, *5*, 3456–3464.
3. Zhang, Y.; Liu, Y.; Zhu, J.; Xiao, D.; Xu, P.; Ma, C.; Gao, C.; Lü, C. Coculture of *Gluconobacter oxydans* and *Escherichia coli* for 3, 4-dihydroxybutyric acid production from xylose. *ACS Sustainable Chem. Eng.* **2021**, *9*, 10809–10817.
